# Supplementary material
Source: Springer Nature journal article supplement (https://www.springermedizin.de/resource/supplementary/13045_2013_385_MOESM3_ESM.pdf/9661272)
Supplement: MOESM3 [file 9661272]

A

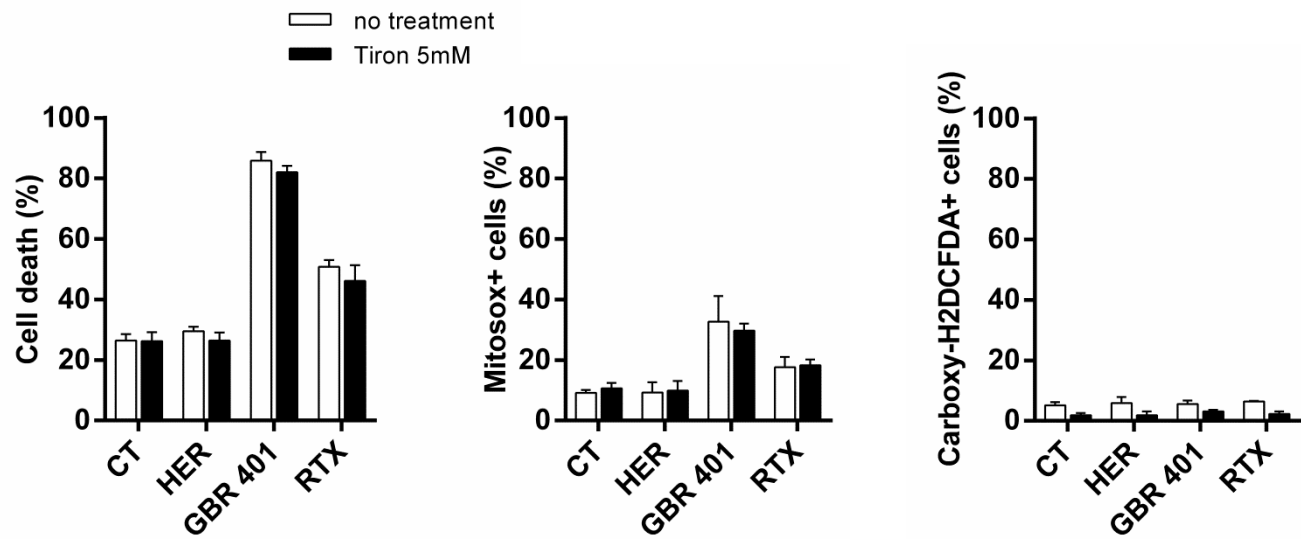

B

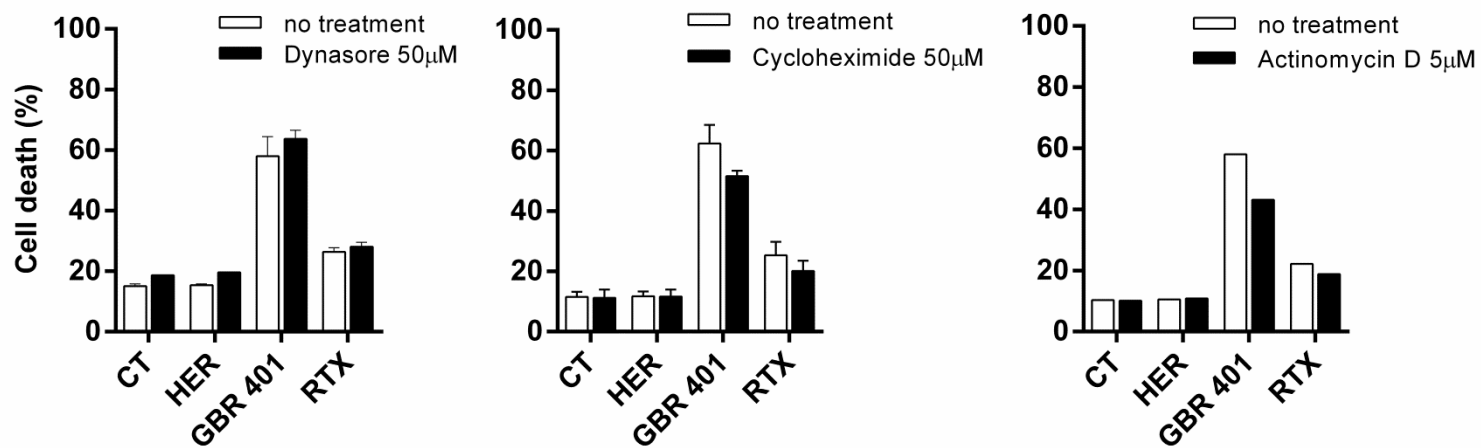

Figure S3
